# Supplementary material for: IFN-γ and TNF-α Impair Lung Development by Upregulating SMAD7 to Inhibit TGF-β Signaling Pathway and ECM Dysregulation
Source: Research Square preprint supplement (doi:10.21203/rs.3.rs-7506004/v1), 2025-09-22
Supplement: Supplementary file 1 [file c2b68059cb0fb165fec2ca4f.docx]

**Supplementary file**

**
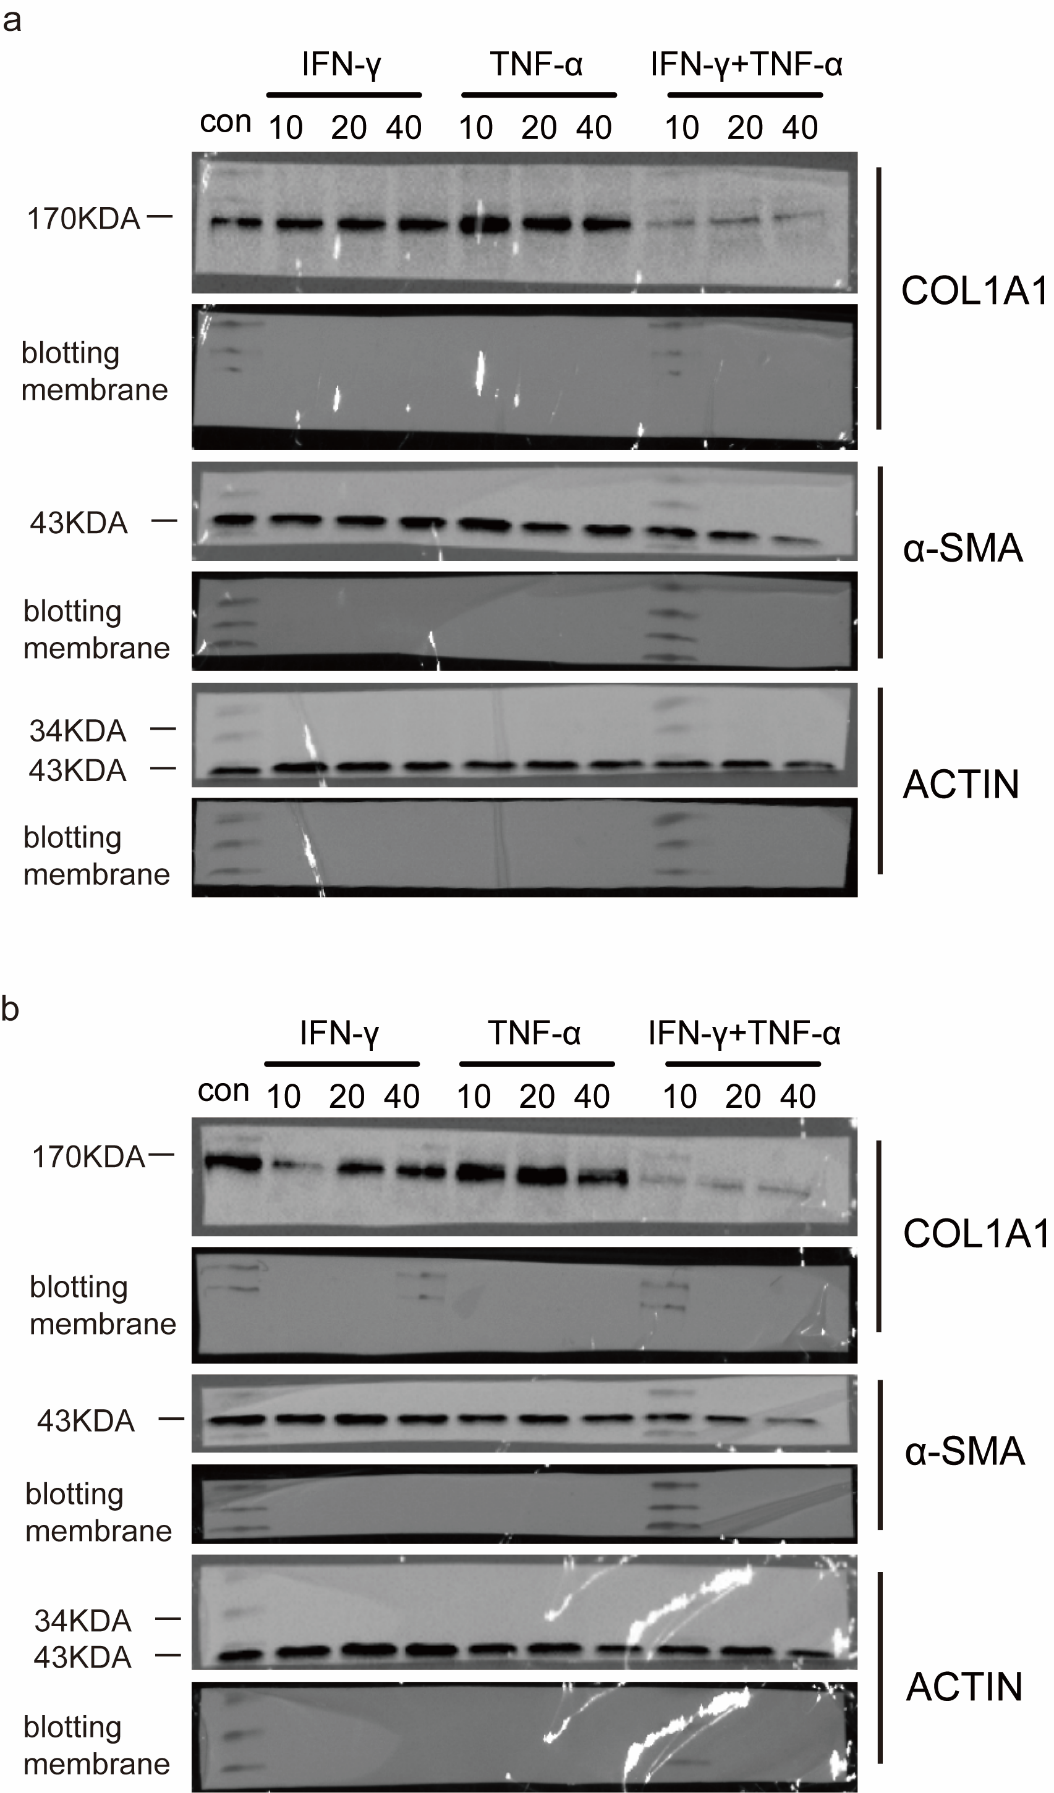
**

**Figure S1.** a and b indicated original Western blot of Figure 3b and Figure3c respectively.

**
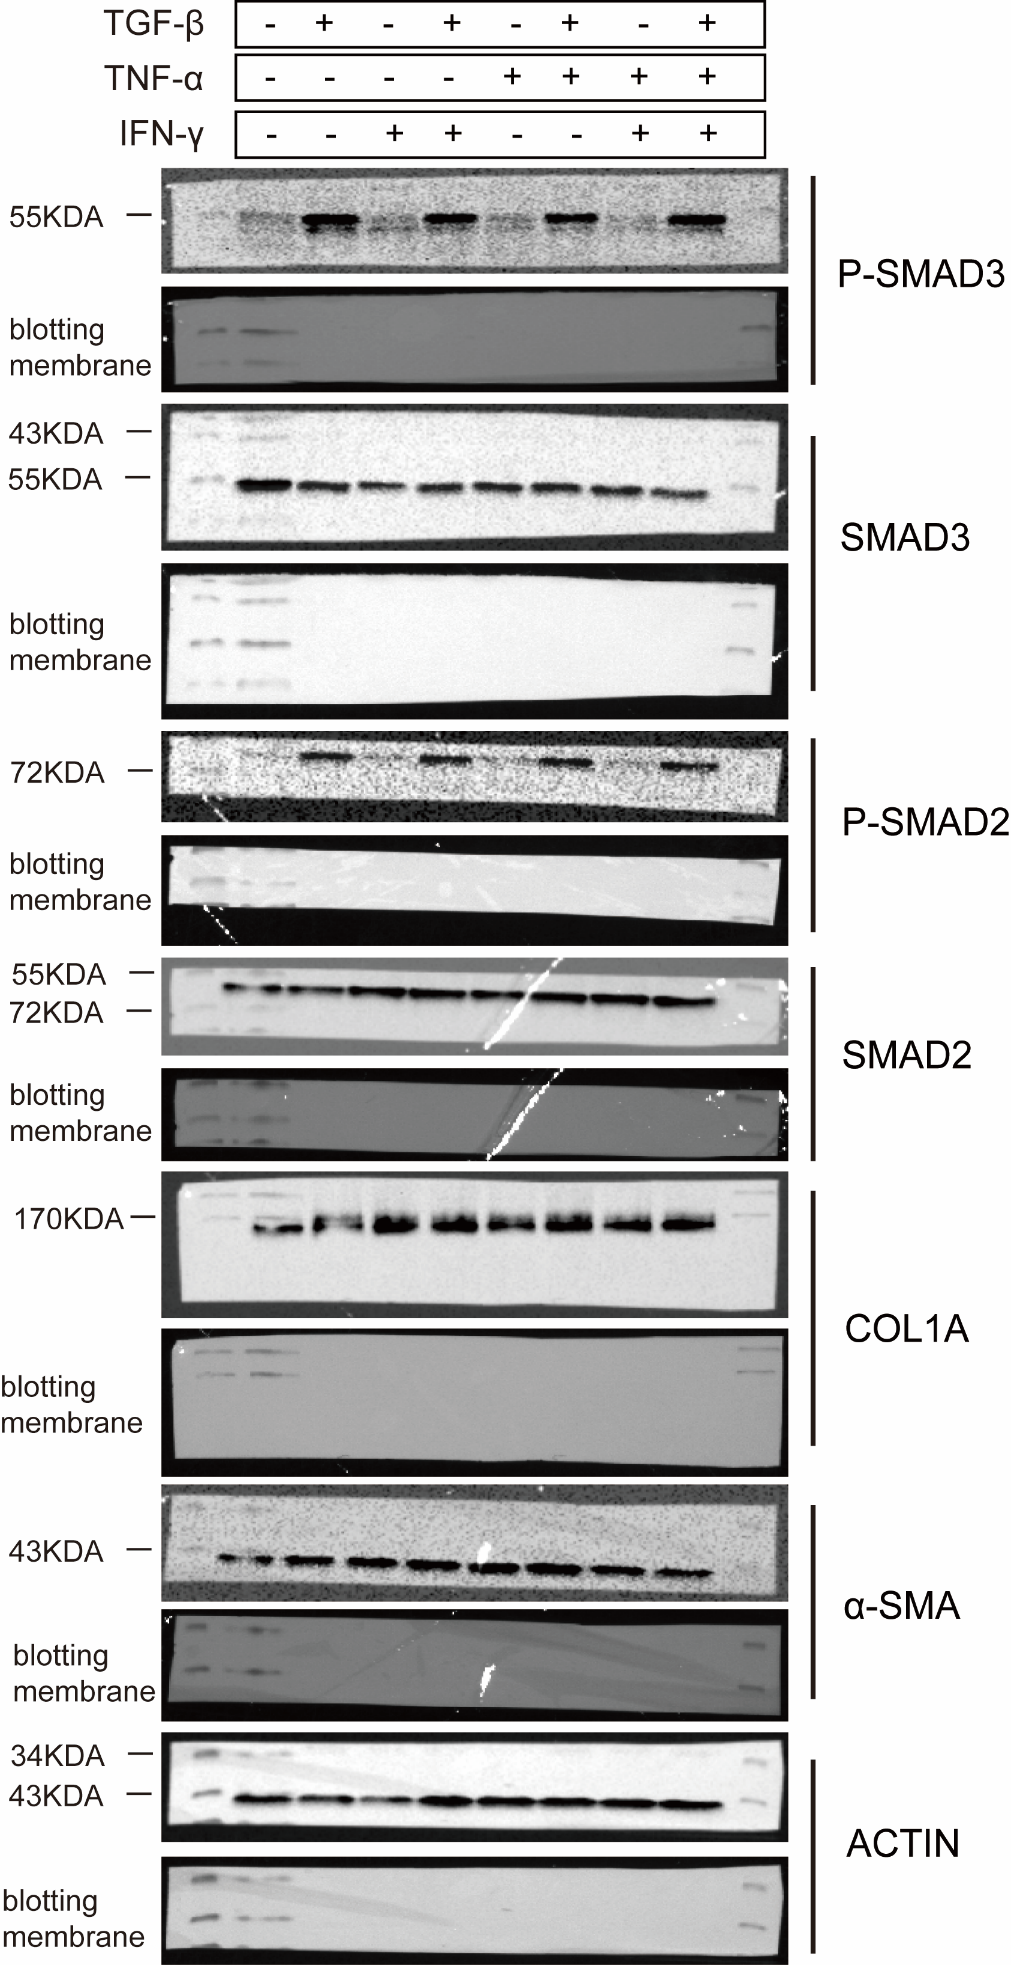
**

**Figure S2.** original Western blot of Figure.4c.

**
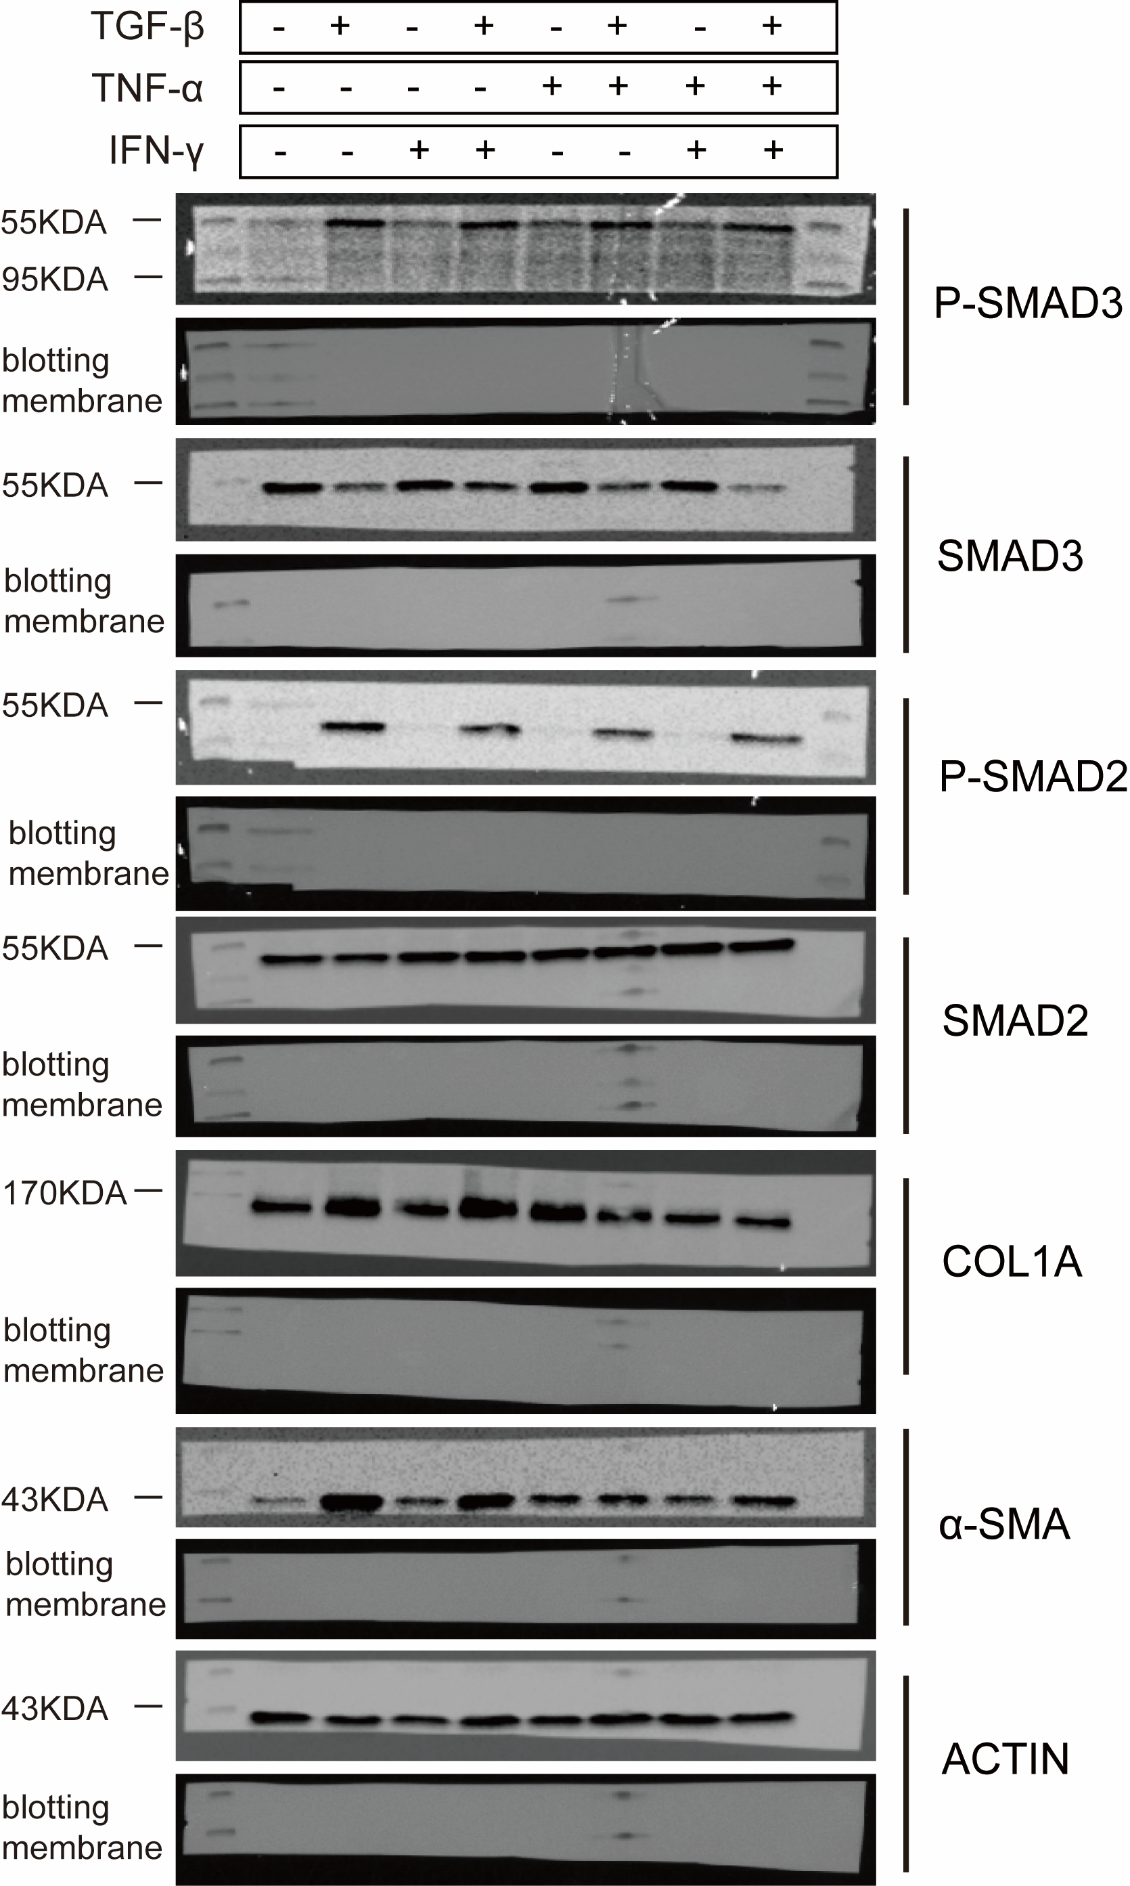
**

**Figure S3.** original Western blot of Figure.4d.

**
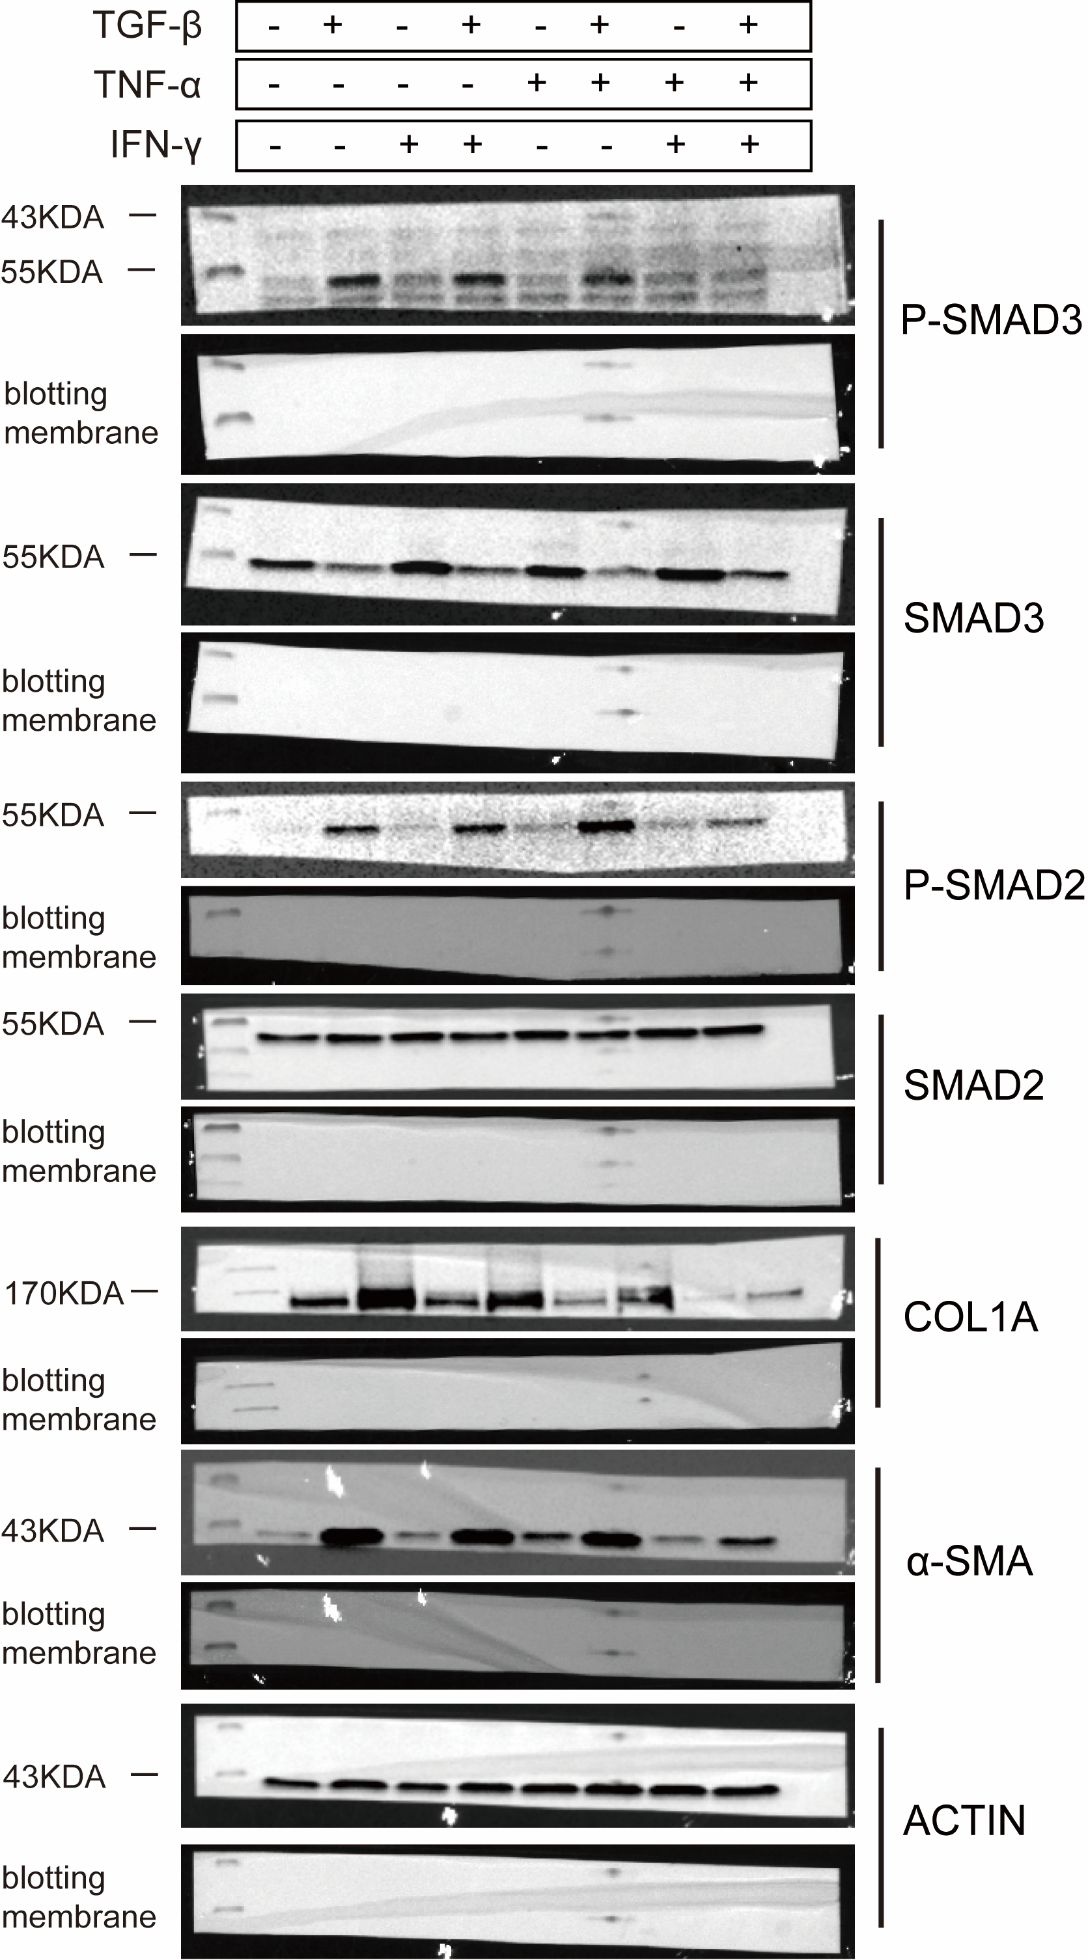
**

**Figure S4.** original Western blot of Figure.4e.


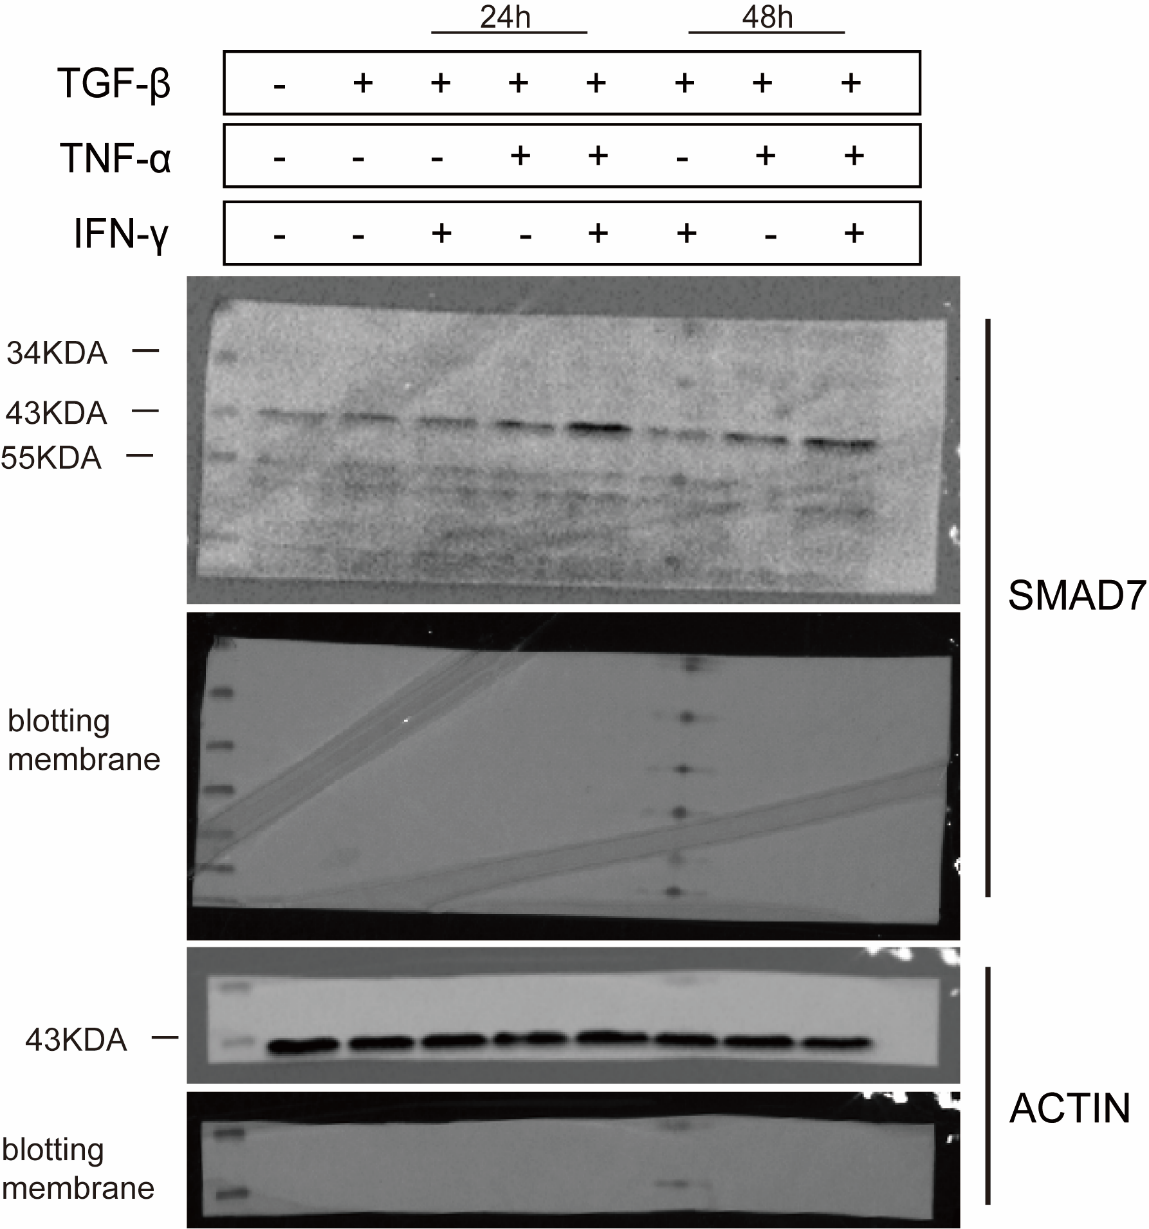


**Figure S5.** original Western blot of Figure.5c.


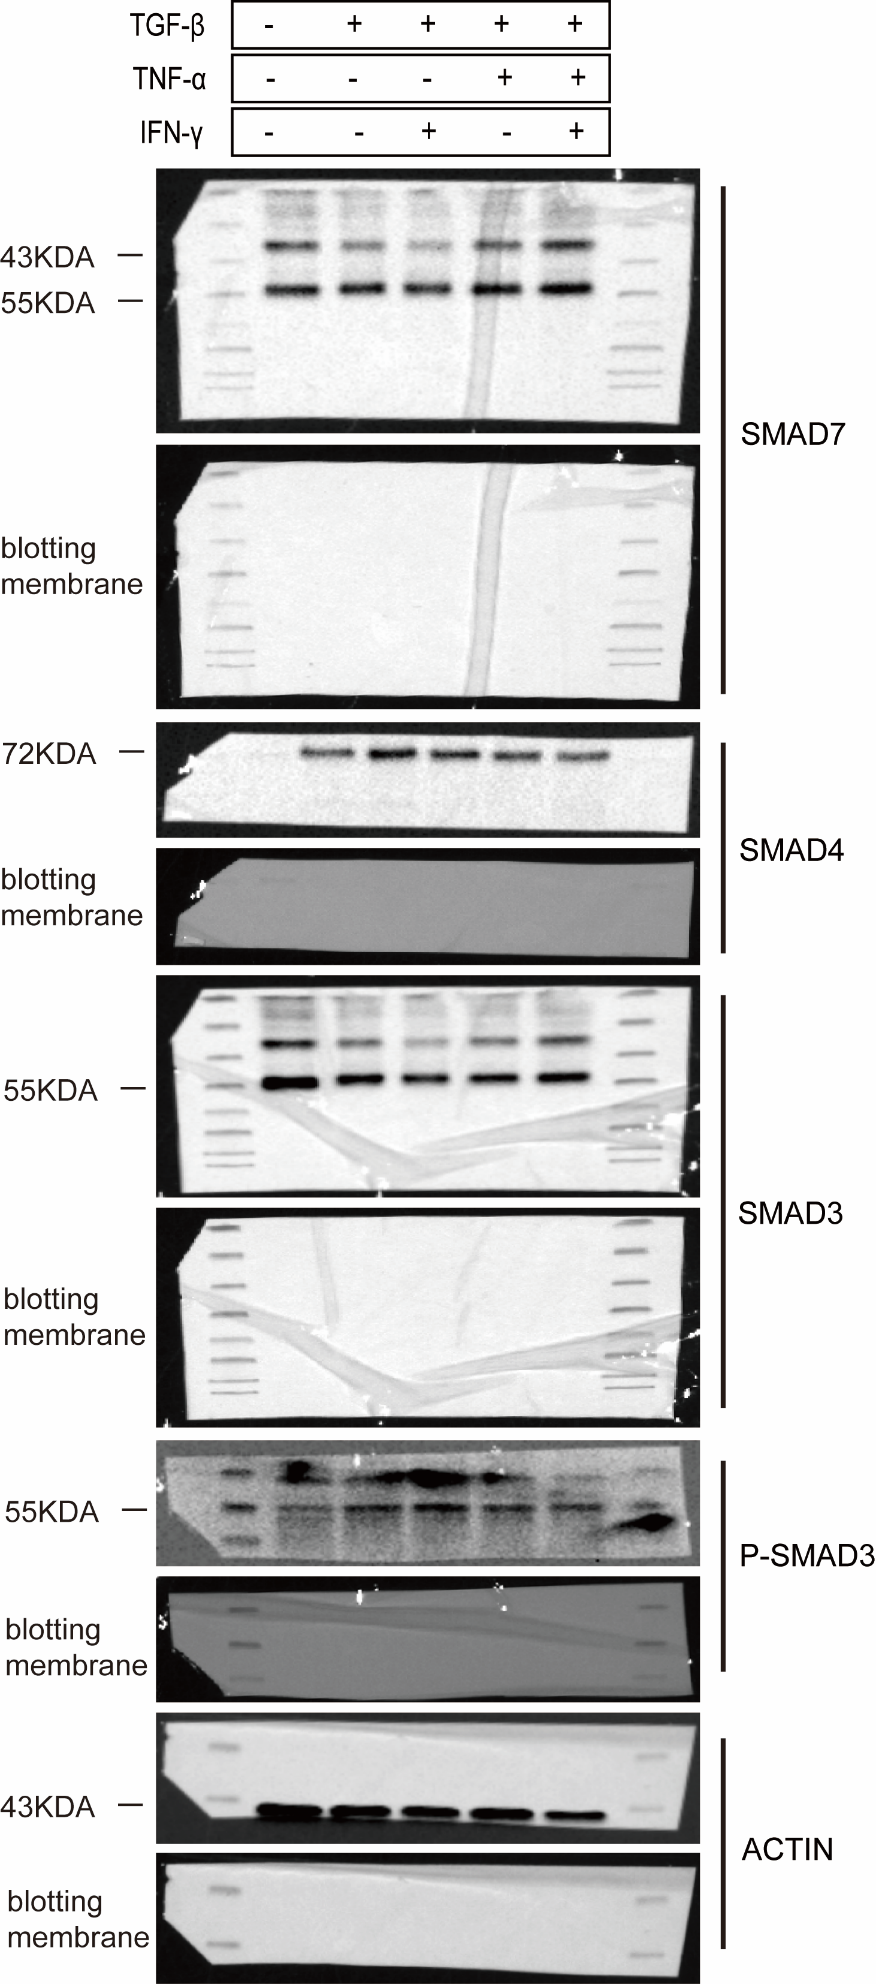


**Figure S6.** original Western blot of Figure.5d.
